# Supplementary material for: Local and remote temperature response of regional SO 2 emissions
Source: Copernicus journal article supplement (doi:10.5194/acp-19-2385-2019), 2019-02-22
Supplement: Supplementary file 1 [file acp-19-2385-2019-supplement.pdf]

Supplement of Atmos. Chem. Phys., 19, 2385–2403, 2019  
<https://doi.org/10.5194/acp-19-2385-2019-supplement>  
© Author(s) 2019. This work is distributed under  
the Creative Commons Attribution 4.0 License.

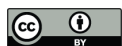

*Supplement of*

## **Local and remote temperature response of regional SO<sub>2</sub> emissions**

**Anna Lewinschal et al.**

*Correspondence to:* Anna Lewinschal ([anna@misu.su.se](mailto:anna@misu.su.se))

The copyright of individual parts of the supplement might differ from the CC BY 4.0 License.

**Table S1.** Global and local cloud properties change per emission change in the ERF simulations, i.e. local changes for 0xEU SO<sub>2</sub> are averaged over EU, for 5xNA SO<sub>2</sub> over NA etc. All values presented are 10<sup>-2</sup>/TgSyr<sup>-1</sup>. The variables are  $r_{eff}$ : cloud top effective radius, LWP: liquid water path, IWP: ice water path, PREC: precipitation, CLDt<sub>tot</sub>: total cloud cover, CLDl<sub>ow</sub>: low cloud cover.

| Experiment                           | 0xEU SO <sub>2</sub> | 7xEU SO <sub>2</sub> | 5xNA SO <sub>2</sub> | 5xEA SO <sub>2</sub> | 10xSA SO <sub>2</sub> |
|--------------------------------------|----------------------|----------------------|----------------------|----------------------|-----------------------|
| Global                               |                      |                      |                      |                      |                       |
| $r_{eff}(\mu m)/\Delta em$           | -1.065               | -0.228               | -0.293               | -0.193               | -0.141                |
| LWP( $gm^{-2}$ )/ $\Delta em$        | 6.657                | 1.414                | 3.534                | 1.976                | 1.805                 |
| IWP( $gm^{-2}$ )/ $\Delta em$        | 0.245                | -0.350               | -0.993               | -0.535               | 0.037                 |
| PREC( $mmd^{-1}$ )/ $\Delta em$      | 0.011                | -0.015               | -0.131               | 0.014                | 0.006                 |
| CLDt <sub>tot</sub> (%)/ $\Delta em$ | 0.108                | 0.693                | -1.518               | 0.303                | -0.119                |
| CLDl <sub>ow</sub> (%)/ $\Delta em$  | 0.469                | -0.154               | 0.088                | -0.156               | -0.187                |
| Local                                |                      |                      |                      |                      |                       |
| $r_{eff}(\mu m)/\Delta em$           | -12.367              | -1.870               | -2.035               | -1.463               | -3.164                |
| LWP( $gm^{-2}$ )/ $\Delta em$        | 108.791              | 18.041               | 20.359               | 18.918               | 13.057                |
| IWP( $gm^{-2}$ )/ $\Delta em$        | 3.848                | -1.60                | -7.520               | 0.079                | -0.665                |
| PREC( $mmd^{-1}$ )/ $\Delta em$      | 0.259                | 0.093                | 0.054                | 1.031                | -0.322                |
| CLDt <sub>tot</sub> (%)/ $\Delta em$ | 0.472                | 3.558                | -4.008               | 0.182                | -1.410                |
| CLDl <sub>ow</sub> (%)/ $\Delta em$  | 2.253                | -0.227               | 0.661                | 0.945                | 0.115                 |

**Table S2.** Global and local cloud properties change per emission change in the coupled simulations, i.e. local changes for 0xEU SO<sub>2</sub> are averaged over EU, for 5xNA SO<sub>2</sub> over NA etc. All values presented are 10<sup>-2</sup>/TgSyr<sup>-1</sup>. The variables are  $r_{eff}$ : cloud top effective radius, LWP: liquid water path, IWP: ice water path, PREC: precipitation, CLDtot: total cloud cover, CLDlow: low cloud cover.

| Experiment                       | 0xEU SO <sub>2</sub> | 7xEU SO <sub>2</sub> | 5xNA SO <sub>2</sub> | 5xEA SO <sub>2</sub> | 10xSA SO <sub>2</sub> |
|----------------------------------|----------------------|----------------------|----------------------|----------------------|-----------------------|
| Global                           |                      |                      |                      |                      |                       |
| $r_{eff}(\mu m)/\Delta em$       | -0.941               | -0.387               | -0.421               | -0.260               | -0.248                |
| LWP( $gm^{-2}$ )/ $\Delta em$    | 2.066                | 1.074                | 1.180                | 0.957                | 0.393                 |
| IWP( $gm^{-2}$ )/ $\Delta em$    | 0.507                | 0.249                | 0.286                | 0.263                | 0.239                 |
| PREC( $mm d^{-1}$ )/ $\Delta em$ | -0.078               | -0.039               | -0.052               | -0.041               | -0.044                |
| CLDtot(%)/ $\Delta em$           | -0.681               | -0.236               | -0.278               | -0.225               | -0.279                |
| CLDlow(%)/ $\Delta em$           | -0.767               | -0.274               | -0.406               | -0.261               | -0.350                |
| Local                            |                      |                      |                      |                      |                       |
| $r_{eff}(\mu m)/\Delta em$       | -12.892              | -1.880               | -2.037               | -1.531               | -3.031                |
| LWP( $gm^{-2}$ )/ $\Delta em$    | 98.090               | 20.053               | 19.099               | 16.213               | 8.307                 |
| IWP( $gm^{-2}$ )/ $\Delta em$    | 2.364                | 0.589                | 0.774                | 0.165                | -0.841                |
| PREC( $mm d^{-1}$ )/ $\Delta em$ | -0.324               | -0.105               | -0.318               | -0.103               | -0.739                |
| CLDtot(%)/ $\Delta em$           | -0.472               | -0.379               | -0.234               | 0.153                | -2.715                |
| CLDlow(%)/ $\Delta em$           | 1.446                | 0.523                | 0.392                | 0.709                | -0.111                |

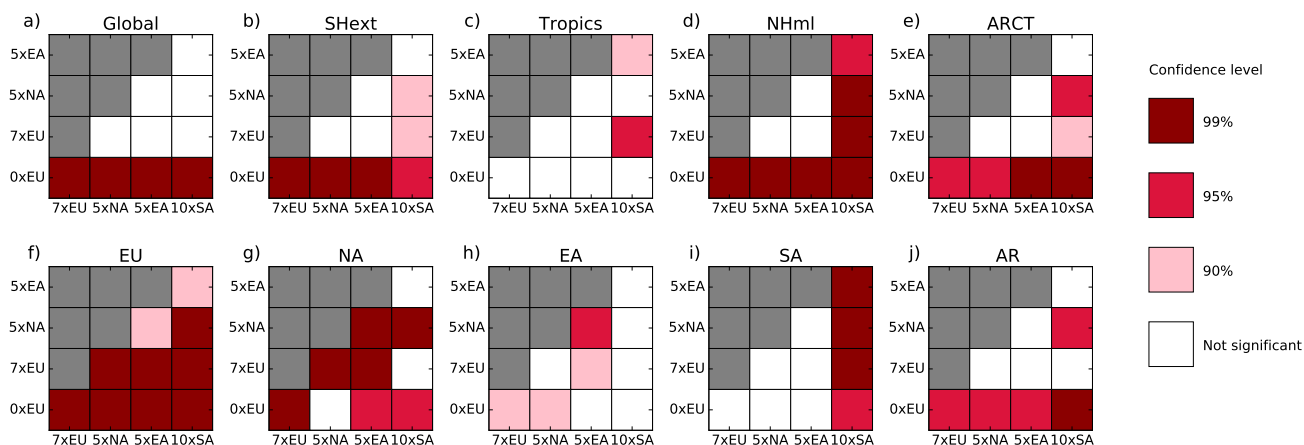

**Figure S1.** Significance levels for temperature differences between the different experiments, for the temperature response regions a) global mean, b) SHext, c) Tropics, d) NHml, e) ARCT, f) EU, g) NA, h) EA, i) SA and j) AR.
